# Supplementary material for: Understanding the Responses of Soil Bacterial Communities to Long-Term Fertilization Regimes Using DNA and RNA Sequencing
Source: MDPI journal article supplement (doi:10.3390/agronomy11122425), 2021-11-28
Supplement: s1 [file s1]

Archive with 2 entries (2 files):
- 6 Table S-20211119.xlsx
- 7 Fig.S-20211119.pdf
