# Supplementary material for: Understanding the Responses of Soil Bacterial Communities to Long-Term Fertilization Regimes Using DNA and RNA Sequencing
Source: MDPI journal article supplement (doi:10.3390/agronomy11122425), 2021-11-28
Supplement: s1 [file s1 › 6 Table S-20211119.xlsx]

## Sheet: Tab.S1
Table S1. Effects of long-term fertilization regimes on soil chemical properties under a wheat–maize rotation in China (0-20cm). Long term averages (mean ± SE) followed by the same letter in the same column are not significantly different (LSD, P < 0.05) in different fertility treatments.
Treatments(T)	TOC (g kg-1)	TN (g kg-1)	TP (g kg-1)	NO3--N (mg kg-1)	Olsen-P (mg kg-1)	Available K (mg kg-1)	pH	C/N
CK	8.83±0.69d	0.84±0.03d	0.64±0.04f	3.61±0.72d	5.01±0.34f	73.35±7.59d	8.84±0.10a	10.53±0.52a
FM	13.07±0.12c	1.26±0.03c	0.90±0.01e	27.10±5.69c	70.60±6.44c	97.73±1.75c	8.14±0.20c	10.34±0.15a
SM	18.40±1.25d	1.70±0.11b	1.50±0.06c	26.36±2.96d	131.88±16.56b	162.2±9.05b	8.45±0.07b	10.81±0.31a
SF	9.55±0.25d	0.93±0.11d	1.38±0.08d	20.80±6.18d	25.90±7.65e	89.53±9.47c	8.56±0.06b	10.36±0.97a
DM	19.87±1.02a	2.60±0.15a	2.52±0.09a	67.36±4.13a	384.38±9.92a	337.13±12.08a	8.10±0.08c	7.64±0.23 b
DF	12.83±0.80c	1.17±0.03c	2.20±0.10b	59.10±9.06c	54.68±8.70d	166.3±15.04b	8.41±0.04b	10.95±0.46a
One Way ANOVA
T	P<0.0001	P<0.0001	P<0.0001	P<0.0001	P<0.0001	P<0.0001	P<0.0001	P<0.0001
CK: no fertilizer; SF: mineral fertilizer input; SM: cattle manure input; FM: half mineral fertilizer input plus half manure applied; DF: double amount mineral fertilizer input; DM: double amount cattle manure input. TOC: total organic carbon; TN: total nitrogen. TP: total phosphorus; NO3--N: nitrate-N; Olsen-P: available P；C/N: the ratio of carbon to nitrogen.

## Sheet: Tab.S2
Table.S2 Proportions (%) of soil bacterial communities at phylum level based on 16S rDNA (-D) and rRNA (-R) sequencing for each fertility treatment.
Taxon	DNA level							RNA level
	CK-D	FM-D	SM-D	SF-D	DM-D	DF-D	Average	CK-R	FM-R	SM-R	SF-R	DM-R	DF-R	Average
Proteobacteria	30.20b	33.55a	33.93a	29.89b	33.61a	29.01b	31.7	47.18a	44.84a	45.88a	44.05a	31.67b	45.32a	43.21
Acidobacteria	14.54b	16.02ab	14.89b	15.56ab	15.62ab	17.51a	15.69	17.16a	15.05abc	15.82ab	13.24bc	7.2d	11.83c	13.41
Actinobacteria	8.98ab	9.04ab	9ab	9.88a	7.55b	8.3ab	8.79	9.66b	13.42b	10.79b	13.17b	17.75a	11.91b	12.57
Chloroflexi	14.74a	9.57c	10.27bc	12.22b	9.35c	10.84bc	10.93	4.95b	5.19b	6.24ab	6.29ab	6.1ab	8.17a	6.22
Planctomycetes	8.41a	9.06a	8.85a	8.61a	8.75a	9.23a	8.82	7.13ab	8.77ab	8.82a	9.35a	5.74b	7.94ab	8.02
Nitrospirae	4.7a	2.82cd	3.36bc	3.87b	2.55d	3.07cd	3.21	5.32a	4.32abc	3.29c	4.63ab	1.2d	3.4bc	3.61
Gemmatimonadetes	4.93b	5.18b	4.62b	6.5a	4.26b	7.65a	5.52	1.15a	1.13a	0.99a	1.11a	1.52a	1.24a	1.18
Bacteroidetes	2.64e	4.67bc	5.43b	3.12de	6.7a	3.98cd	4.42	0.27c	0.61c	2.17ab	0.43c	6.69a	0.95bc	1.79
Firmicutes	0.87bc	1.56b	1.32b	0.66c	3.74a	1.31b	1.34	1.3b	0.99b	0.8b	0.87b	17.65a	2.03b	3.88
Unclassified	2.24a	1.58b	1.69ab	1.94ab	1.83ab	1.77ab	1.84	1.39a	1.29ab	0.96bc	1.34ab	0.61c	1.38a	1.14
Cyanobacteria	0.66a	0.61a	0.63a	0.5a	0.42a	0.53a	0.99	2.2ab	2.01ab	1.88b	2.75a	0.78c	2.54a	2.01
Verrucomicrobia	0.98a	0.96a	0.98a	0.8a	0.84a	0.85a	0.9	0.9bc9	1.51abc	1.96ab	1.3abc	0.89c	2.29a	1.51
Candidate_division_WS3	0.83b	0.75c	1.03b	1.33a	1b	0.96b	0.98	0.36a	0.24ab	0.19b	0.31ab	0.25ab	0.32ab	0.28
Candidate_division_OD1	0.81a	0.95a	0.97a	0.81a	1.31a	0.88a	0.96	0b	0b	0.01b	0b	0.23a	0.04b	0.05
Candidate_division_OP3	0.85a	0.41bc	0.4bc	0.55b	0.28c	0.45bc	0.52	0.06a	0.05a	0.03a	0.03a	0.05a	0.09a	0.05
others	3.62	3.27	2.63	3.76	2.19	3.66	3.38	0.88	0.58	0.17	1.13	1.67	0.55	1.07
Note: The same letter in the same horizon line are not significantly different (LSD, P < 0.05) of different treatments in the DNA level and RNA level, seperately.
CK: no fertilizer; SF: mineral fertilizer input; SM: cattle manure input; FM: half mineral fertilizer input plus half manure applied; DF: double amount mineral fertilizer input; DM: double amount cattle manure input

## Sheet: Tab.S3
Table.S3 Proportions (%) of soil bacterial communities at class level based on 16S rDNA (-D) and rRNA (-R) sequencing for each fertility treatment.
Taxon	DNA level							RNA level
	CK-D	FM-D	SM-D	SF-D	DM-D	DF-D	Average	CK-R	FM-R	SM-R	SF-R	DM-R	DF-R	Average
Deltaproteobacteria	7.33b	7.96a	8.39a	8.02a	7.45b	7.24b	7.73	26.37a	20.12b	17.20bc	20.94b	6.54d	15.46c	17.77
Acidobacteria	11.95b	14.06ab	12.74b	13.35ab	13.27ab	15.63a	13.5	14.02a	12.72abc	13.41ab	10.58bc	6.02d	10.20c	11.16
Alphaproteobacteria	9.86a	8.82b	8.51b	8.77b	8.27b	8.83b	8.84	14.10a	12.93a	13.37a	14.12a	13.28a	15.72a	13.92
Betaproteobacteria	6.97b	9.65a	9.95a	7.45b	9.92a	6.87b	8.47	2.20c	6.29ab	8.22ab	5.01bc	5.74bc	9.51a	6.16
Gammaproteobacteria	5.80bc	6.75ab	6.71ab	5.32c	7.38a	5.76bc	6.29	3.61c	5.13abc	6.77a	3.62c	5.82ab	4.33bc	4.88
Planctomycetacia	3.60b	4.17ab	3.94ab	3.87ab	4.75a	4.79a	4.19	5.80ab	7.22a	6.96a	7.97a	4.31b	6.15ab	6.4
Actinobacteria	2.39a	2.56a	2.59a	2.39a	1.88b	2.05a	2.31	5.32b	8.14ab	6.55ab	9.04ab	11.58a	7.54ab	8.03
Nitrospira	4.04a	2.82c	2.94c	3.87ab	2.55c	3.07bc	3.21	5.65a	4.32ab	3.29b	4.63ab	1.09c	3.40b	3.73
Gemmatimonadetes	4.93b	5.18b	4.62b	6.50a	4.26b	7.65a	5.52	1.23b	1.13bc	0.99c	1.11bc	1.52a	1.24b	1.2
Anaerolineae	5.84a	3.64b	3.83b	4.76ab	3.04b	4.53ab	4.27	2.78ab	1.68bc	2.11bc	2.65abc	1.31c	4.01a	2.42
Acidimicrobiia	2.32a	2.44a	2.88a	2.70a	2.70a	3.20a	2.71	1.85a	2.15a	2.10a	2.07a	2.48a	1.92a	2.1
Thermoleophilia	2.81ab	2.84ab	2.40b	3.25a	2.25b	2.07b	2.6	0.63b	2.04ab	1.45ab	1.27b	2.91a	1.77ab	1.68
Unclassified	3.10a	2.21b	2.41b	2.78ab	2.61ab	2.49b	2.6	2.03a	1.89a	1.53b	1.94a	0.98c	1.94a	1.72
Bacilli	0.82ab	0.83ab	0.55b	0.56b	0.94ab	1.04a	0.79	1.15b	0.89b	0.66b	1.11b	9.10a	1.31b	2.37
Holophagae	1.82a	1.35b	1.31b	1.30b	1.60ab	1.37b	1.46	2.89a	2.04ab	2.10ab	2.35a	1.00c	1.43bc	1.97
Cytophagia	1.47d	2.70bc	3.42ab	1.90cd	3.85a	2.14cd	2.58	0.21b	0.32b	0.75ab	0.23b	0.93a	0.48b	0.49
Phycisphaerae	2.24a	2.26a	2.13a	2.04a	1.84a	2.19a	2.12	0.15c	0.28b	0.38ab	0.26b	0.45a	0.49a	0.33
Caldilineae	2.06a	1.23b	1.55ab	1.73ab	1.20b	1.46ab	1.54	0.75b	0.84ab	0.98a	0.93a	0.86ab	1.06a	0.91
Cyanobacteria	2.33a	0.15b	0.27b	0.72b	0.13b	0.19b	0.63	1.86ab	1.81ab	1.58ab	2.57a	0.55c	2.14a	1.75
KD4-96	1.03b	1.17ab	1.09b	1.41a	1.03b	1.18ab	1.15	1.24a	0.85b	1.06ab	0.98ab	1.29a	0.97ab	1.07
OM190	0.95b	1.34ab	1.74a	1.31ab	1.46ab	0.95b	1.29	0.80b	0.80b	1.00a	0.64c	0.69c	0.72b	0.77
Clostridia	0.06c	0.41b	0.63b	0.05c	1.22a	0.13c	0.42	0.03b	0.09b	0.12b	0.02b	7.60a	0.16b	1.34
Sphingobacteriia	1.00b	1.68ab	1.65ab	1.09b	1.91a	1.62ab	1.49	0.13c	0.21c	0.52a	0.16c	0.50a	0.39b	0.32
Gitt-GS-136	0.75c	0.93bc	1.24b	1.16b	1.60a	0.92bc	1.1	0.07b	0.12b	0.17b	0.15b	0.74a	0.27b	0.25
Candidate_division_WS3_norank	0.83b	0.75b	1.03ab	1.33a	1.00ab	0.96ab	0.98	0.21a	0.24a	0.19a	0.31a	0.25a	0.32a	0.25
MB-A2-108	1.02a	0.75b	0.70b	1.07a	0.40c	0.58c	0.75	0.36b	0.67a	0.39b	0.49b	0.47b	0.35b	0.46
OPB35_soil_group	0.51a	0.43a	0.24b	0.41a	0.32ab	0.37ab	0.38	0.64b	0.68b	0.90ab	0.66b	0.44b	1.40a	0.79
Pla4_lineage	1.02a	0.94a	0.69ab	0.97a	0.47b	1.00a	0.85	0.36a	0.23a	0.25a	0.25a	0.17a	0.30a	0.26
Candidate_division_OD1_norank	0.81b	0.95b	0.97b	0.81b	1.31a	0.88b	0.96	0.00b	0.00b	0.01b	0.00b	0.23a	0.04b	0.05
Bacteroidia	0.01a	0.01a	0.00a	0.01a	0.01a	0.00a	0	0.00b	0.00b	0.00b	0.00b	4.83a	0.05b	0.81
Candidate_division_OP3_norank	1.05a	0.41b	0.40b	0.55b	0.28c	0.45b	0.52	0.13a	0.05b	0.03b	0.03b	0.05b	0.09a	0.06
others	9.28	8.59	8.46	8.57	9.12	8.37	8.73	3.41	4.12	4.98	3.9	6.29	4.84	4.59
Note: The same letter in the same horizon line are not significantly different (LSD, P < 0.05) of different treatments in the DNA level and RNA level, seperately.
CK: no fertilizer; SF: mineral fertilizer input; SM: cattle manure input; FM: half mineral fertilizer input plus half manure applied; DF: double amount mineral fertilizer input; DM: double amount cattle manure input
